# Supplementary material for: Chicoric Acid Effectively Mitigated Dextran Sulfate Sodium (DSS)-Induced Colitis in BALB/c Mice by Modulating the Gut Microbiota and Fecal Metabolites
Source: MDPI journal article supplement (doi:10.3390/ijms25020841), 2024-01-10
Supplement: s1 [file s1]

# Supplementary Materials

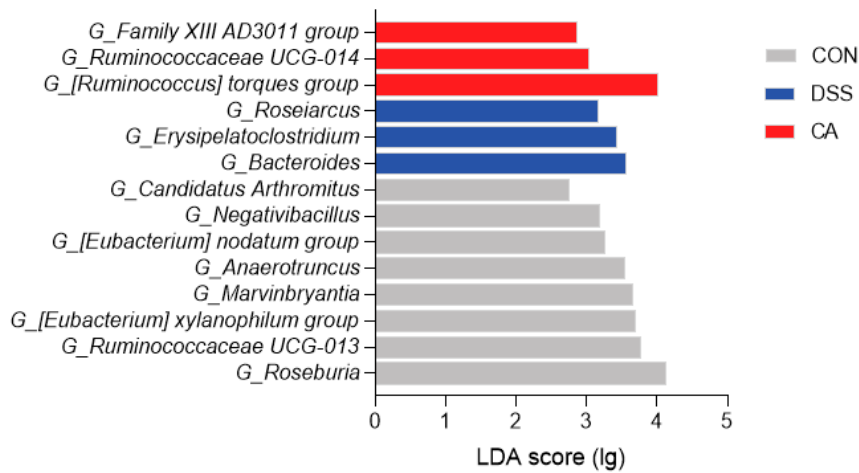

**Figure S1.** LefSe analysis on genus levels. Species were displayed that exhibited significant differences among groups, characterized by LDA values greater than 2.5.

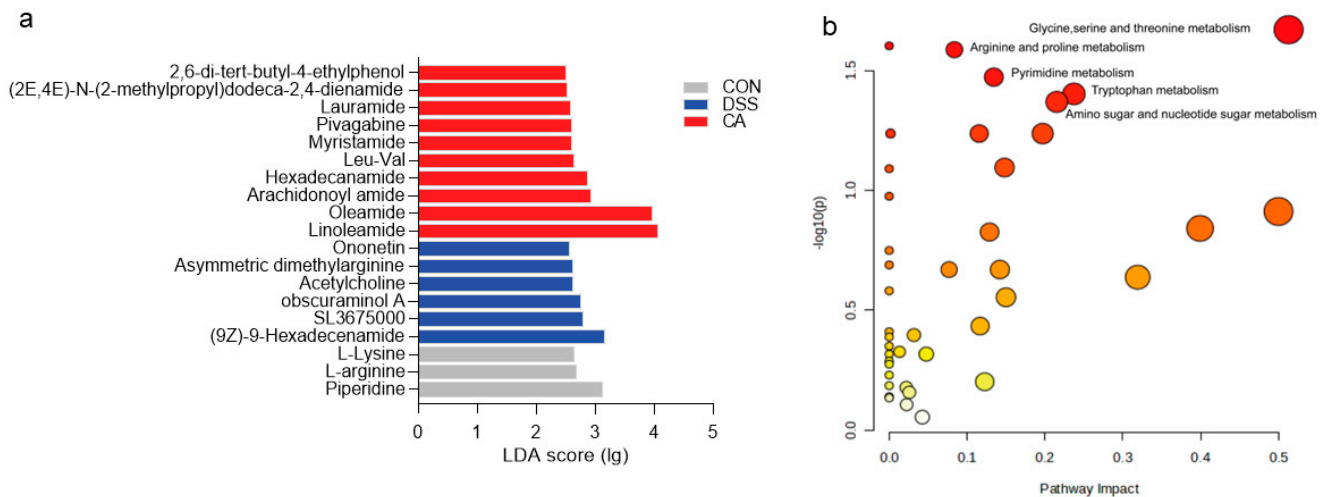

**Figure S2.** (a) Key metabolites identified by LefSe analysis. Metabolites characterized by LDA values greater than 2.5. (b). KEGG pathway analysis of differential metabolites in the CA vs DSS group. Each dot on the graph represents a distinct KEGG pathway, with dot size corresponding to the number of metabolites in the pathway. Larger dots indicate a higher metabolite count. The color of each dot reflects the  $p$ -value magnitude, with darker colors indicating smaller  $p$ -values.
